# Supplementary material
Source: HighWire-hosted journal article supplement (https://www.annfammed.org/highwire/filestream/7569/field_highwire_adjunct_files/0/Appendix_1.pdf)
Supplement: Appendix_1.pdf [file Appendix_1.pdf]

Zink T, Elder N, Jacobson J, Klostermann B. Medical management of intimate partner violence considering the stages of change: precontemplation and contemplation. *Ann Fam Med*. 2004;2:231-239.

<http://www.annfammed.org/cgi/content/full/2/3/231/DC1>

---

## Appendix 1. Interview Questions

Describe the situation that brought you here (shelter or support group)?

Have you sought medical care because of the abuse? Tell me about that?

Has a physician or nurse asked you about the abuse? (emergency, primary care, pregnant, pediatrics)

Probing questions:

Did you disclose IPV?

Why or Why not?

What was helpful?

What was not helpful?

What would have been helpful to women in your situation?

What would have made you not share the abuse?

Do you remember seeing pamphlets about IPV anywhere in the office?

Do you receive routine care? Primary care? Pap smears?

Same probing questions

Think of when you were pregnant.

Same probing questions

Can you think of a situation when you went to the doctor and when you were upset about the abuse? What did the physician say or do that helped you? Or what do you wish he/she had said or done to help you?

Questions about screening preferences in front of children (not analyzed in this article)

---

IPV = intimate partner abuse; Pap = Papanicolaou.
